# Supplementary material for: Reprocessed 2-D airgun seismic reflection data SALTFLU (salt deformation and sub-salt fluid circulation in the Algero-Balearic abyssal plain) in the Balearic promontory and the Algerian basin
Source: Copernicus journal article supplement (doi:10.5194/essd-2022-258), 2022-08-11

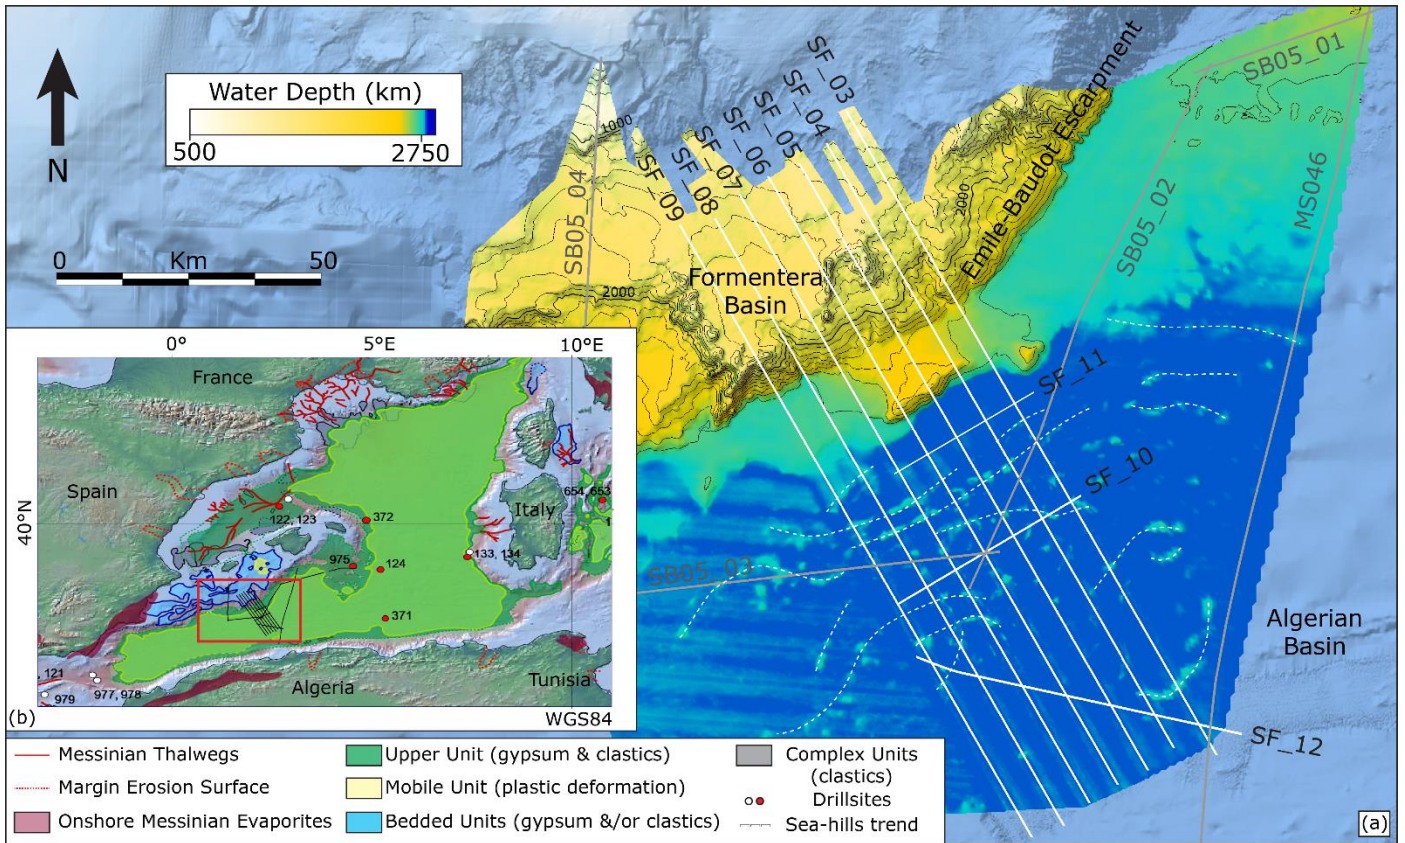

Figure 1 Study area offshore Balearic Islands, Spain. Seismic lines acquired by the National Institute of Oceanography and Applied Geophysics (OGS) are superimposed on a bathymetric map and on the relief map of the Mediterranean with DSDP and ODP drillsites (in red the ones that sampled MSC evaporites) superimposed to the present-day spatial extent of the MSC marker (Lofi, 2018). Topographic highs on the sea-bottom illustrate the presence of piercing diapiric structures. SF refers to SALTFLU lines presented in this paper, SB05 refers to survey SBAL-DEEP 2005, MS046 to profile 46 of the Mediterranean survey.

| Quality Check                                         | Processing Step                                                                                                                                                                                                                                                                                                                                                                                 | Navigation Processing                                                                                   |
|-------------------------------------------------------|-------------------------------------------------------------------------------------------------------------------------------------------------------------------------------------------------------------------------------------------------------------------------------------------------------------------------------------------------------------------------------------------------|---------------------------------------------------------------------------------------------------------|
|                                                       | <b>Input Field Data</b>                                                                                                                                                                                                                                                                                                                                                                         | <b>Import raw navigation</b>                                                                            |
| <b>Cross-plot maps</b>                                | <b>Geometry merging</b>                                                                                                                                                                                                                                                                                                                                                                         | <b>Edit Navigation</b><br>Match FFID numbers to the corresponding shot numbers based on observer's logs |
| <b>Fold distribution, Stack</b>                       | <b>CMP Binning</b>                                                                                                                                                                                                                                                                                                                                                                              |                                                                                                         |
| <b>Output difference, Stack</b>                       | <b>1<sup>st</sup> pass Low Frequency Noise Attenuation on shot gathers</b><br>Butterworth filter 2/30dB/Oct - 110/96dB/Oct                                                                                                                                                                                                                                                                      |                                                                                                         |
| <b>Time direct wave first break on near channel</b>   | <b>Recording delay shift statics</b><br>Shift statics of -40 ms                                                                                                                                                                                                                                                                                                                                 |                                                                                                         |
| <b>Visual checking</b>                                | <b>Resampling to 4 ms</b>                                                                                                                                                                                                                                                                                                                                                                       |                                                                                                         |
| <b>Output difference, Stack</b>                       | <b>FX Prediction Filtering (CRG)</b><br>Run 1: 0-125Hz, 20 traces x 500ms windows, amplitude threshold > 8<br>Run 2: 0-125Hz, 11 traces x 500ms windows, amplitude threshold > 8<br>Run 3: 0-3Hz, 31 traces x 1000ms windows, amplitude threshold > 1<br>Run 4: 0-5Hz, 11 traces x 1000ms windows, amplitude threshold > 4<br>Run 5: 6-12Hz, 11 traces x 500ms windows, amplitude threshold > 5 |                                                                                                         |
| <b>Visual checking</b>                                | <b>Missing shot interpolation</b><br>Sorting to Common shot gathers<br>1 <sup>st</sup> small gap interpolation in the F-K domain using patches of 500 ms x 21 traces<br>2 <sup>nd</sup> big gap interpolation in the F-K domain using patches of 300 ms x 125 traces                                                                                                                            |                                                                                                         |
| <b>(Output difference, Stack)</b>                     | <b>Linear Radon Filtering</b><br>Passing P range -0.35 to 0.7ms/m                                                                                                                                                                                                                                                                                                                               |                                                                                                         |
| <b>(Output difference, frequency spectrum, Stack)</b> | <b>Deghosting in FK domain</b><br>Zero padding to left and right of shot gathers<br>Extrapolation to left and right of shot gathers<br>Receiver-side deghost, patch 2000 ms x 21 traces, reflection coeff -0.95, Regularization 0.05<br>Shot-side deghost, patch 1400 ms x 240 traces, reflection coeff -0.95, Regularization 0.1                                                               | <b>Stacking velocity analysis</b><br>500m CMP interval for every line                                   |
| <b>Visual checking, frequency spectrum</b>            | <b>Signature Estimation</b><br>Align water bottom<br>trim corrections base on max cross-correlation peak of traces<br>Stack                                                                                                                                                                                                                                                                     |                                                                                                         |
| <b>Visual checking, frequency spectrum</b>            | <b>Designature operator estimation</b><br>Design matching filter between water-bottom derived signature and a targeted band limited Zero-phase Ormsby wavelet 4-8-40-120                                                                                                                                                                                                                        |                                                                                                         |
| <b>Output difference, Stack</b>                       | <b>Designature Application</b>                                                                                                                                                                                                                                                                                                                                                                  |                                                                                                         |
| <b>Output difference, Stack</b>                       | <b>Low-Frequency attenuation</b><br>Ormsby low-cut filter 3-7 Hz                                                                                                                                                                                                                                                                                                                                |                                                                                                         |
| <b>Visual, Frequency spectrum</b>                     | <b>Inverse Q correction (phase)</b><br>Q = 120 below seabed, reference frequency = 50 Hz                                                                                                                                                                                                                                                                                                        |                                                                                                         |
| <b>Residual move-out, stack</b>                       | <b>Isotropic Pre-Stack Time Migration, then velocity refining every 250 CDP (~1.5km)</b><br>Offset regularization                                                                                                                                                                                                                                                                               |                                                                                                         |
| <b>Visual</b>                                         | <b>Radon Demultiple Model</b><br>Parabolic radon transform from -200ms to 500ms (reference offset= 2500m) with an AGC wrap of 500ms<br>Left mute (Decreasing from 100 to 30 ms depending on iterations)                                                                                                                                                                                         |                                                                                                         |
| <b>Output difference, Stack</b>                       | <b>Multiple subtraction</b><br>Data - Radon Model                                                                                                                                                                                                                                                                                                                                               |                                                                                                         |
| <b>Output difference, Stack</b>                       | <b>10 CDP (~50m), Automated residual velocity analysis</b><br>Auto-picking +- 10% velocity, every 25 ms<br>Pick smoothing (51 CDPs)                                                                                                                                                                                                                                                             | - OUT: Pre-migration final demultiple data<br>- OUT: Stack & Migration RMS velocity                     |
| <b>Visual, Frequency spectrum</b>                     | <b>Inverse Q correction (amplitude)</b><br>Q = 120 below seabed, reference frequency = 50 Hz                                                                                                                                                                                                                                                                                                    |                                                                                                         |
| <b>Stack</b>                                          | <b>Stack</b><br>Angle mute 48deg<br>Stack<br>Waterbottom mute                                                                                                                                                                                                                                                                                                                                   | - Processed Migration stacks                                                                            |

Figure 2 Time domain reprocessing sequence and parameters applied to the SALTFLU dataset



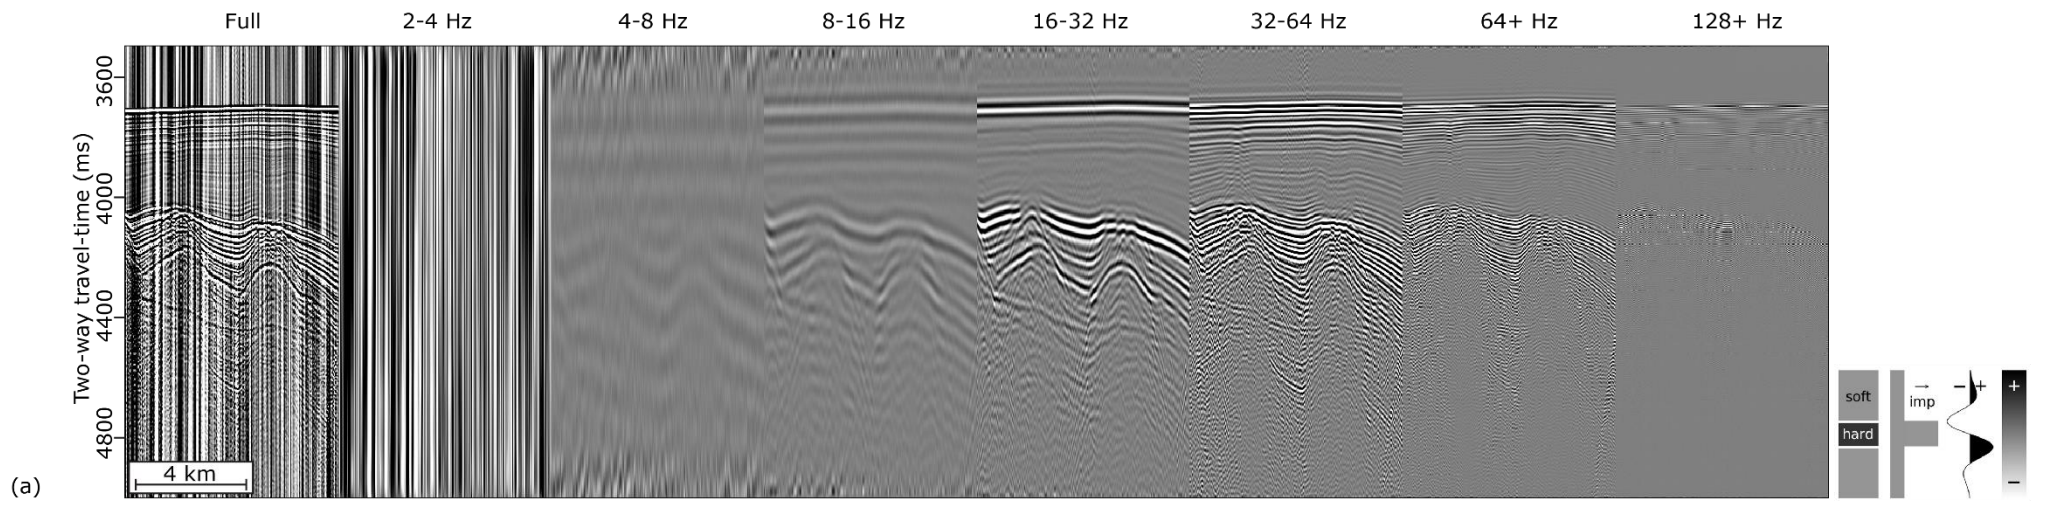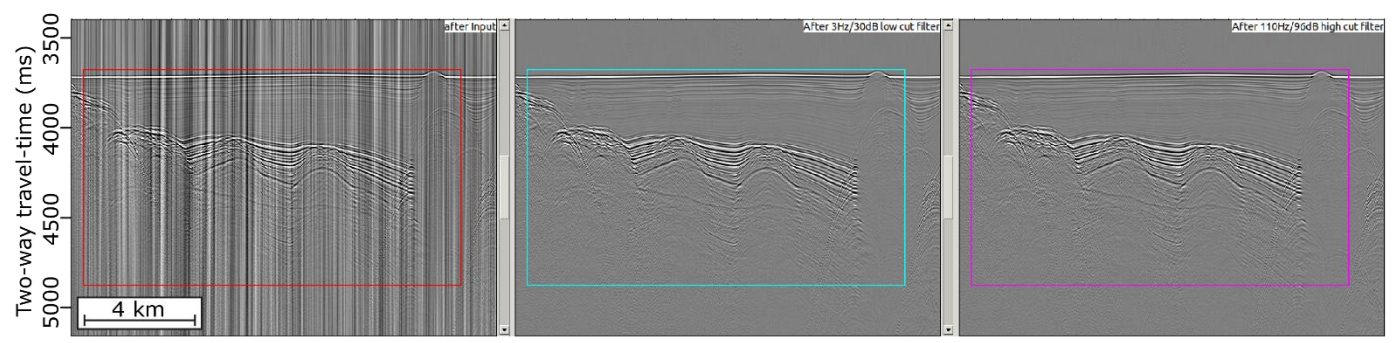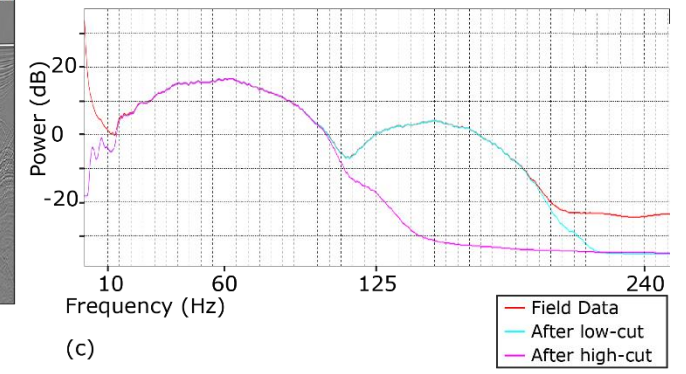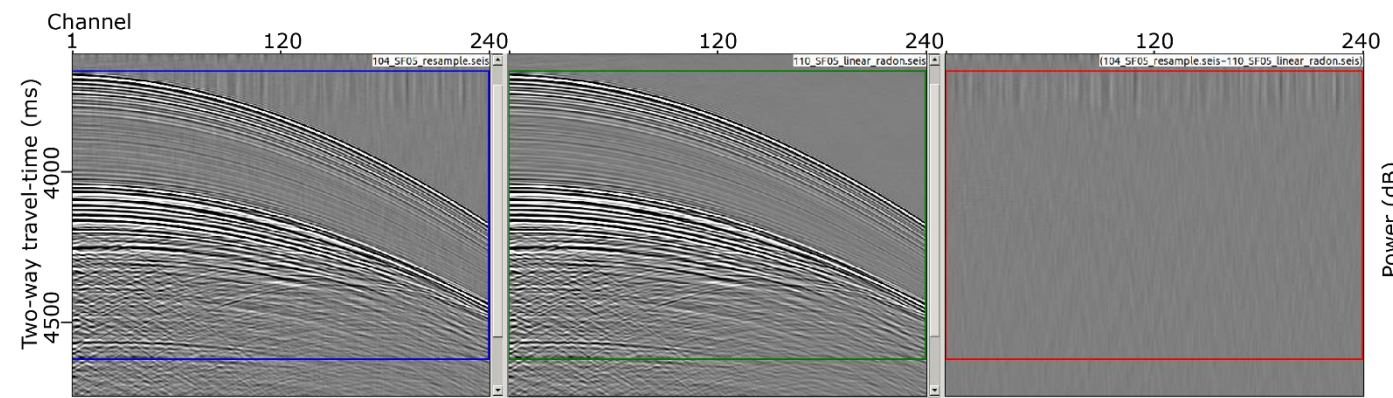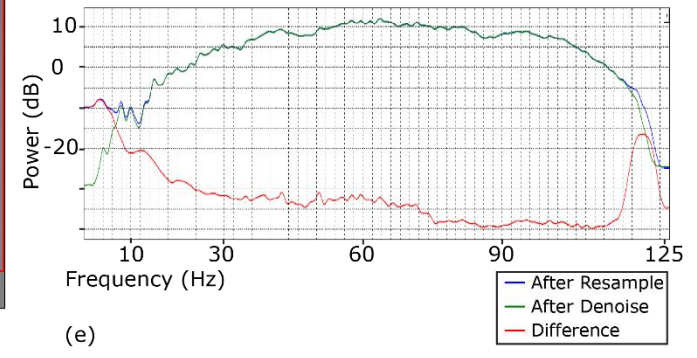

*Figure 3 Seismic sections of part of the SF05 line illustrating the results at different steps of the noise attenuation stage (a) Frequency panels at different octaves of raw field data; (b) Input near-trace-plot (left), outputs after low-cut filter (middle) and high-cut filter (right); (c) Frequency spectra corresponding to (b); (d) Input shot gather after resampling to 4 ms (left) versus after linear low-frequency noise removal steps (middle), and difference panel between the two (right); (e) Frequency spectra corresponding to (d).*



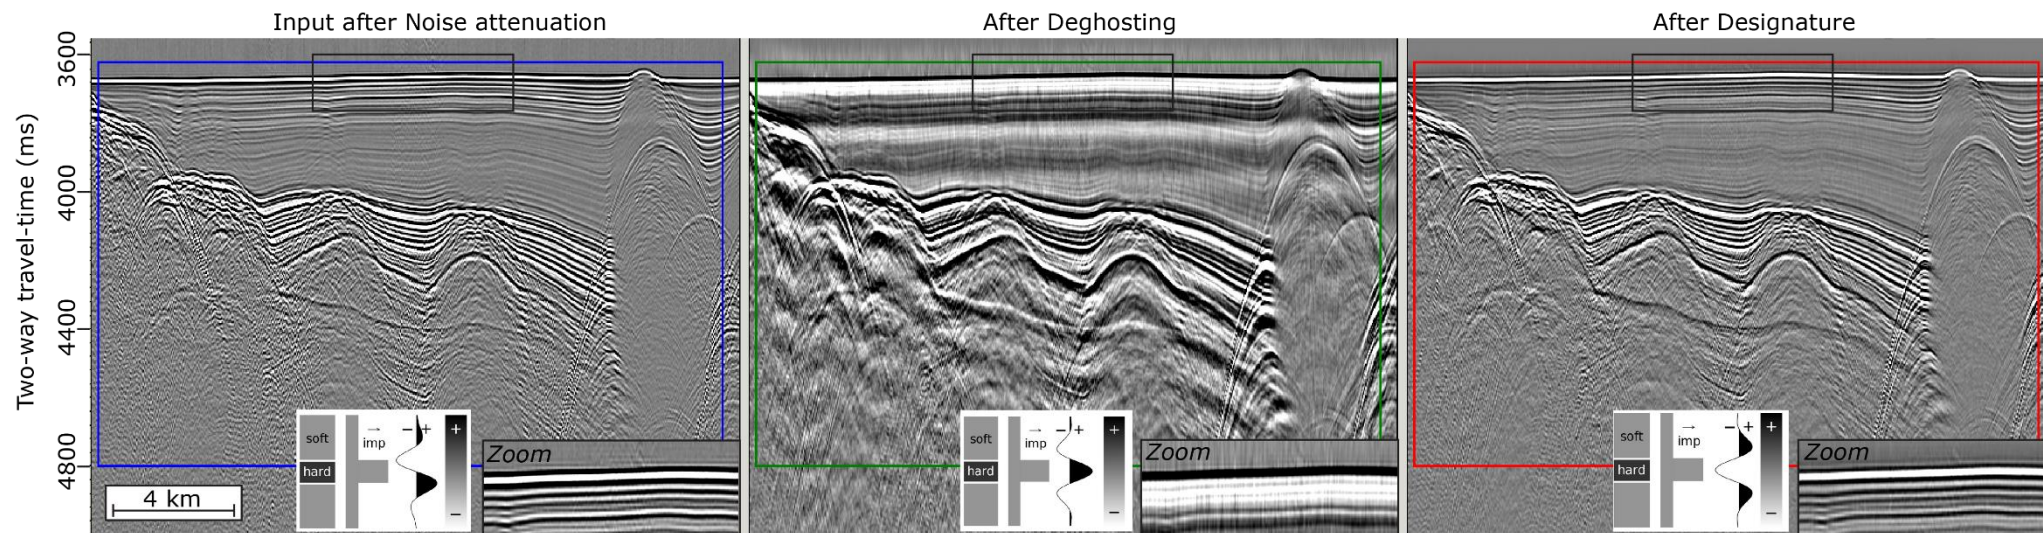

(a)

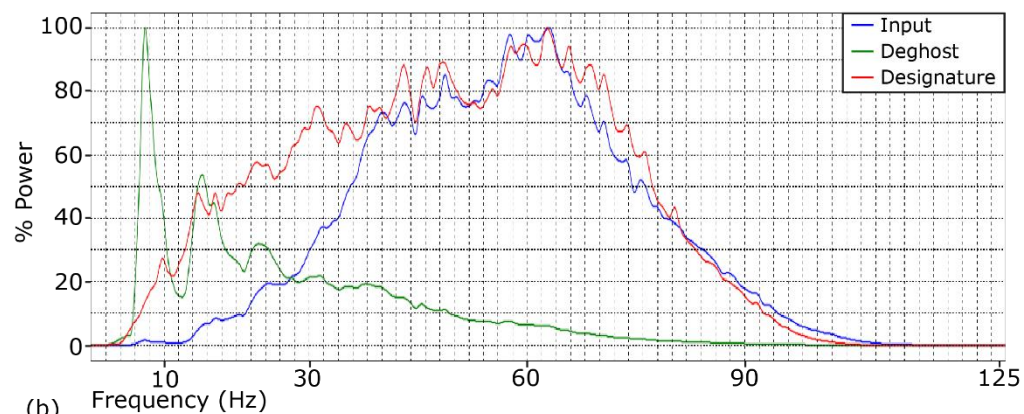

(b)

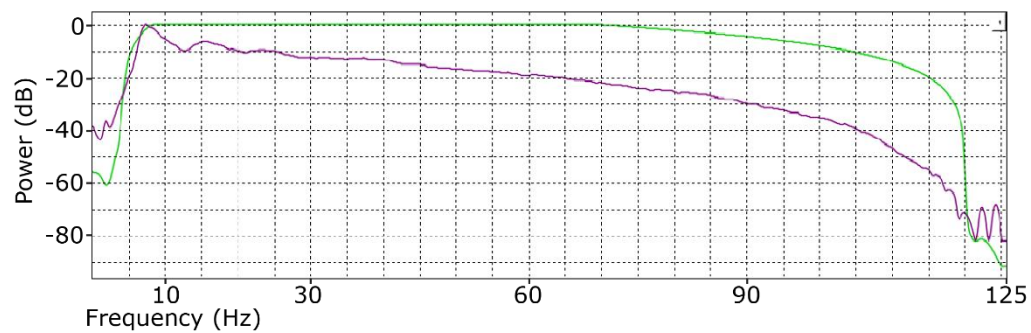

(c)

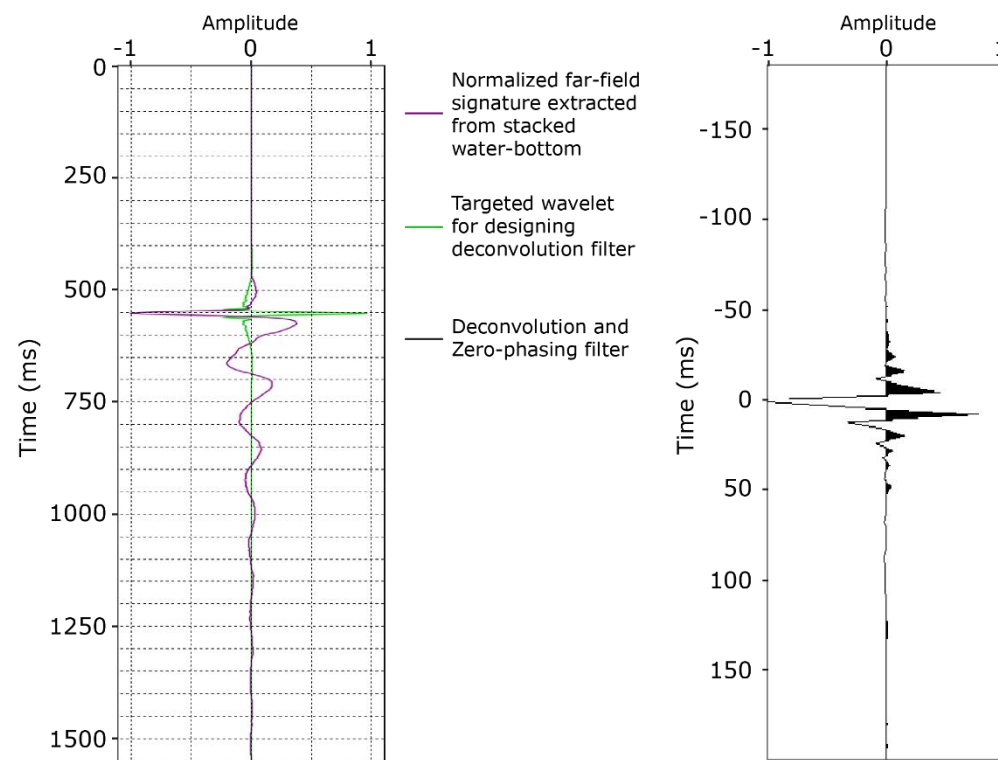

(d)

(e)

*Figure 4 Results from the bandwidth enhancement stage. (a) Near-trace gather before deghosting (left), after deghosting (middle) and after source signature (right); (b) Frequency spectra corresponding to (a); (c) Far-field source signatures estimated from the stacked seabed, overlain with the target Ormsby wavelet used for designing the source signature (debubble and zero-phasing) operator.; (e) The resulting source signature operator*



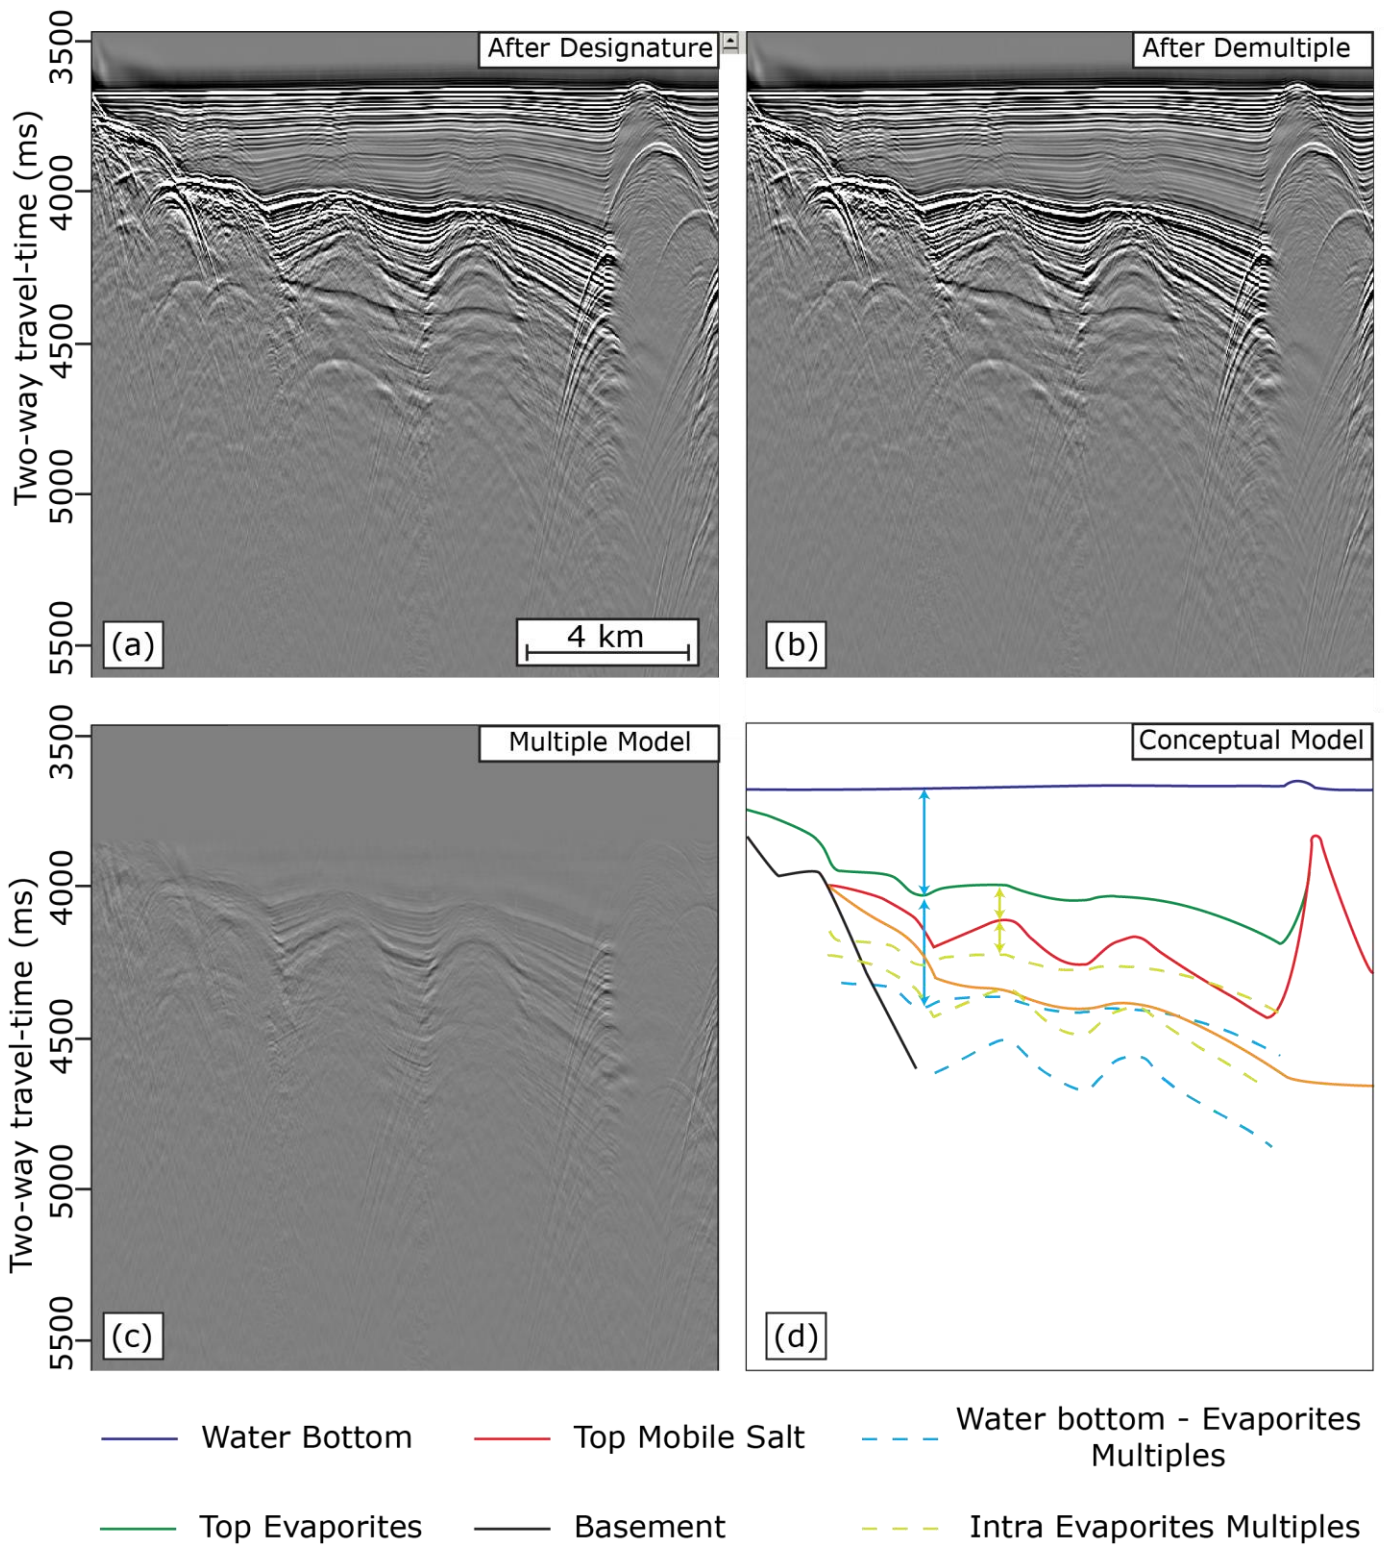

Figure 5 Stacked sections after Radon demultiple. (a) Input data; (b) Demultiplied data; (c) Difference between (a) and (b), i.e., the modelled multiples; (d) Sketch cartoon of the major multiple generating horizons and corresponding multiples. Due to the water depth water-bottom (blue) related multiples are not superimposed on the primary reflections in the target geology and are not an issue for the deep-water Algerian basin. Most multiples are observed below the Top Evaporites (green).

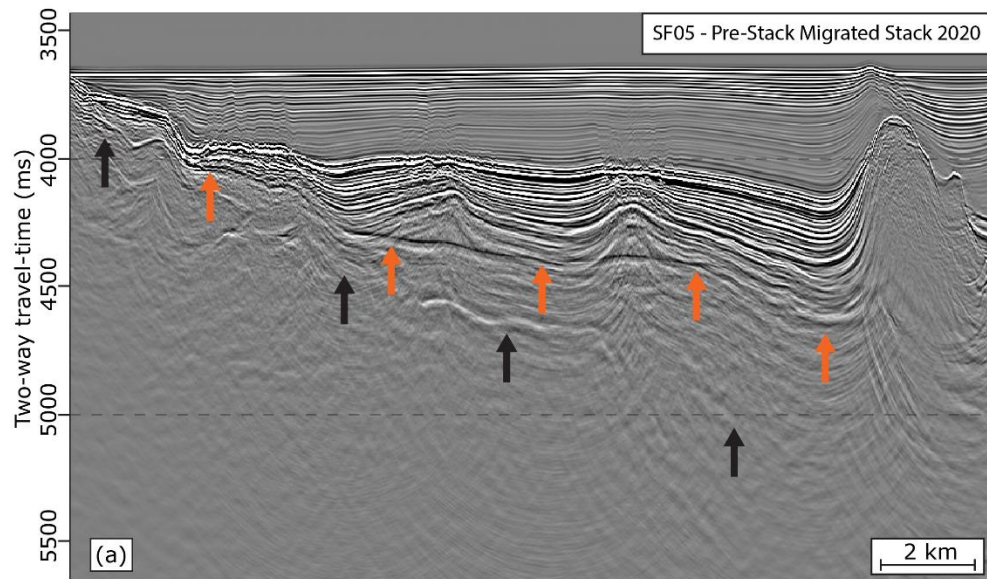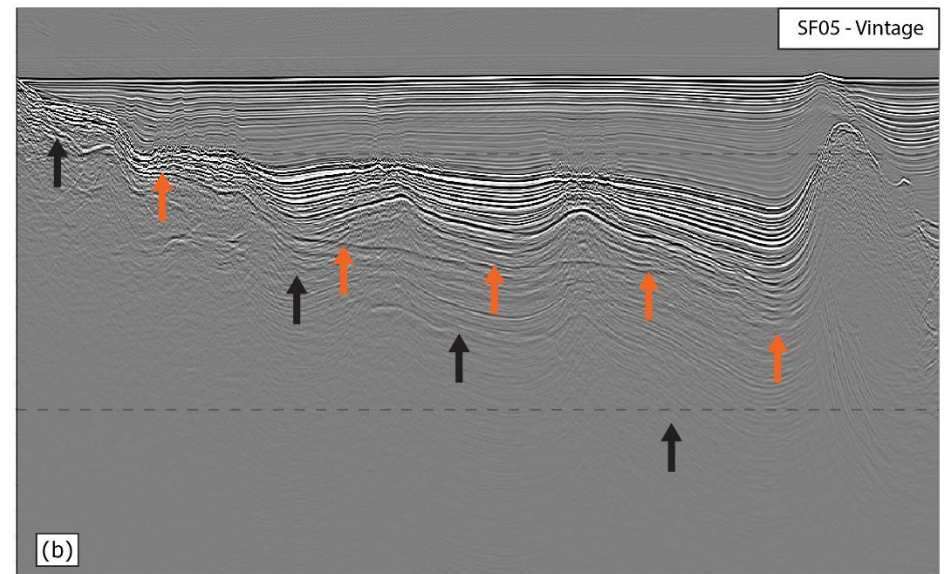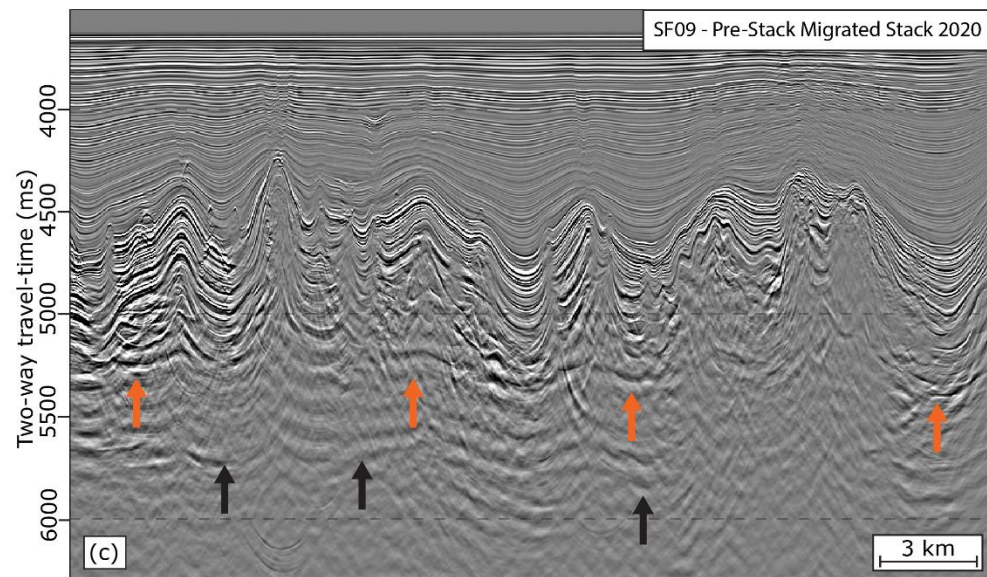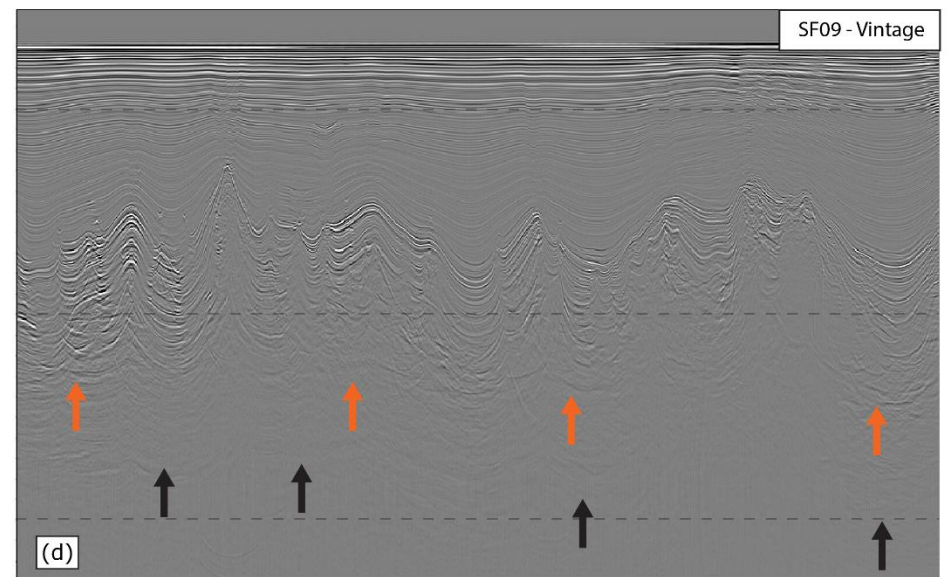

↑ Base Mobile Salt      ↑ Pre-salt seismic horizons



*Figure 6 Comparison between the newly re-processed sections (left; a and c) and the vintage sections (right; b and d) in time domain, for sections of lines SF05 (a and b) and SF09 (c and d). Bandwidth enhancement and Radon demultiple allow better imaging of the base salt horizon (orange arrows) and pre-salt horizons (black arrows).*

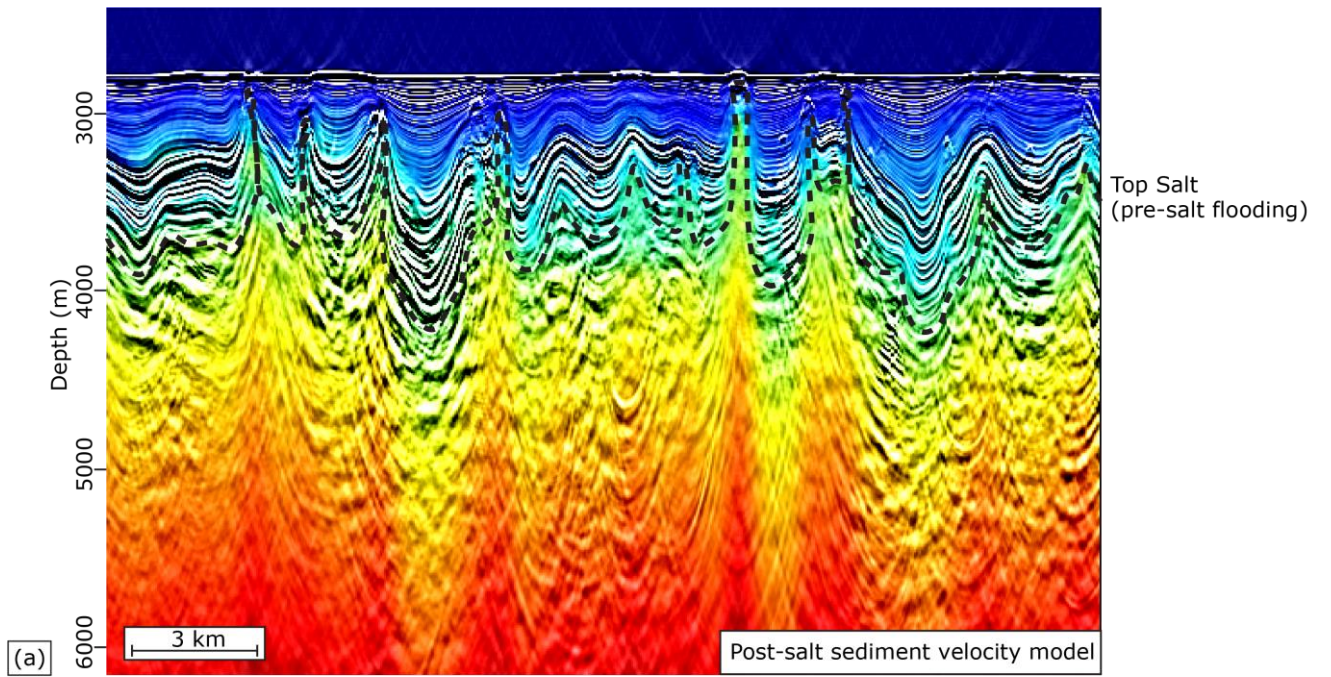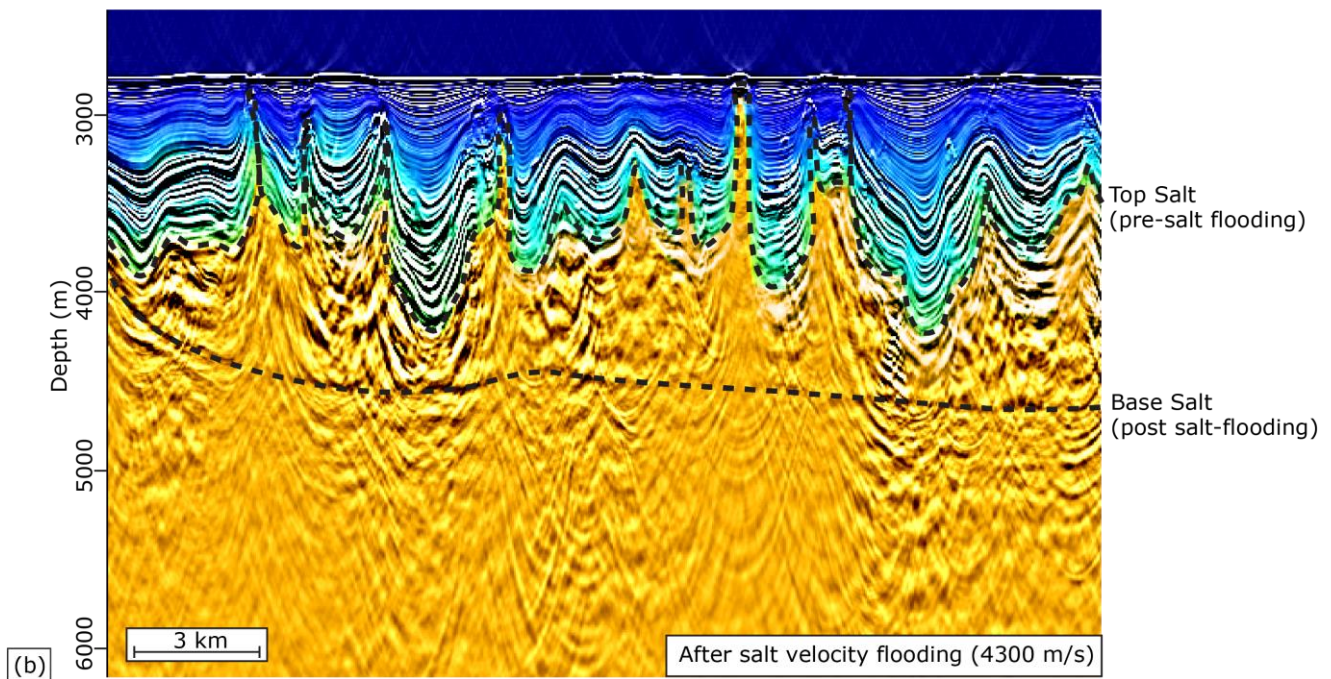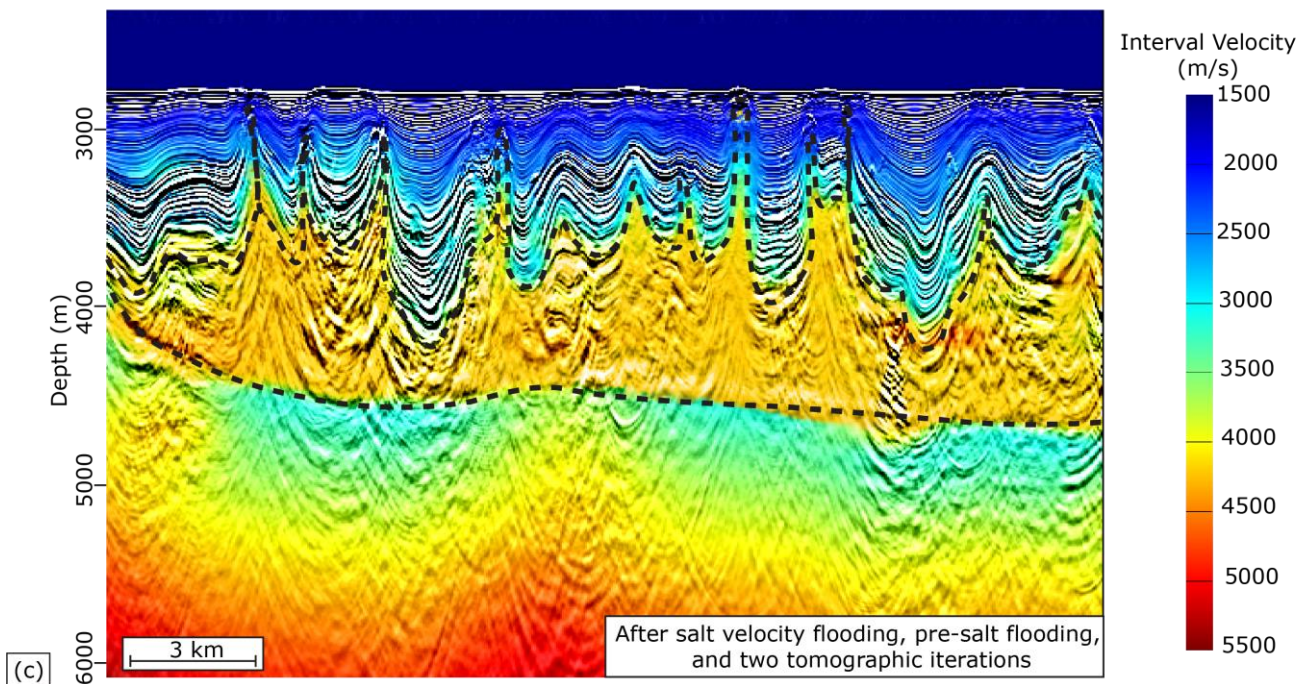



*Figure 7 Pre-stack depth migration sections and velocity models after 3 iteration of tomographic velocity updates in the post-salt (before salt velocity flooding) (a); after salt velocity flooding until the bottom of the sections in order to pick the base salt horizon (b); and after salt velocity flooding between top and base salt horizons and two iterations of tomographic velocity updates post flooding (c).*



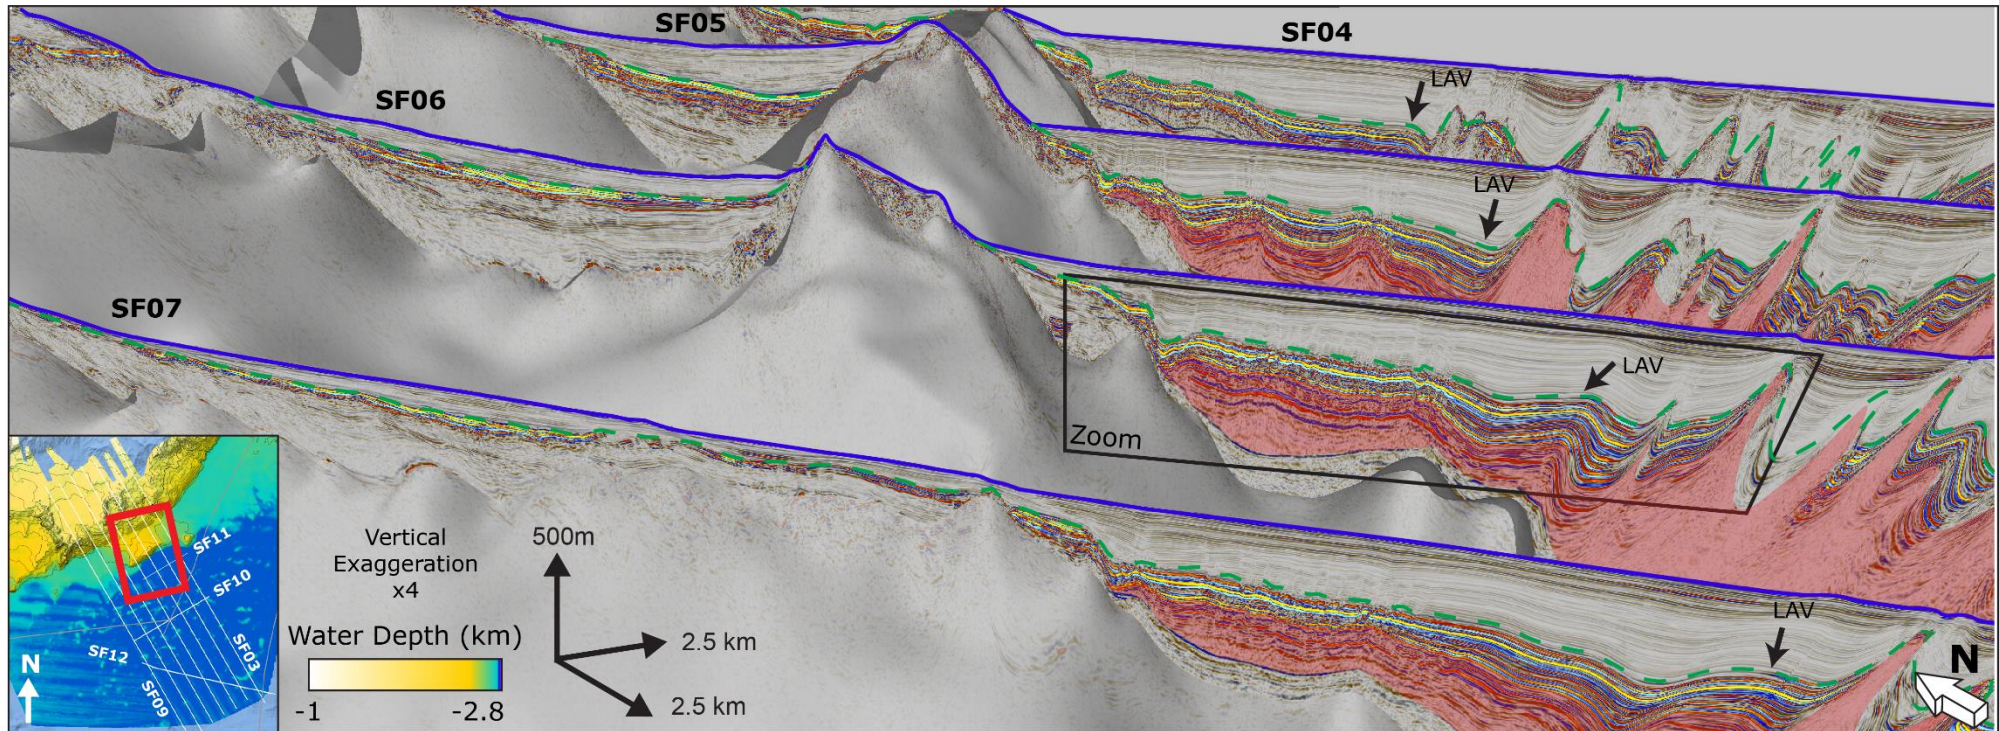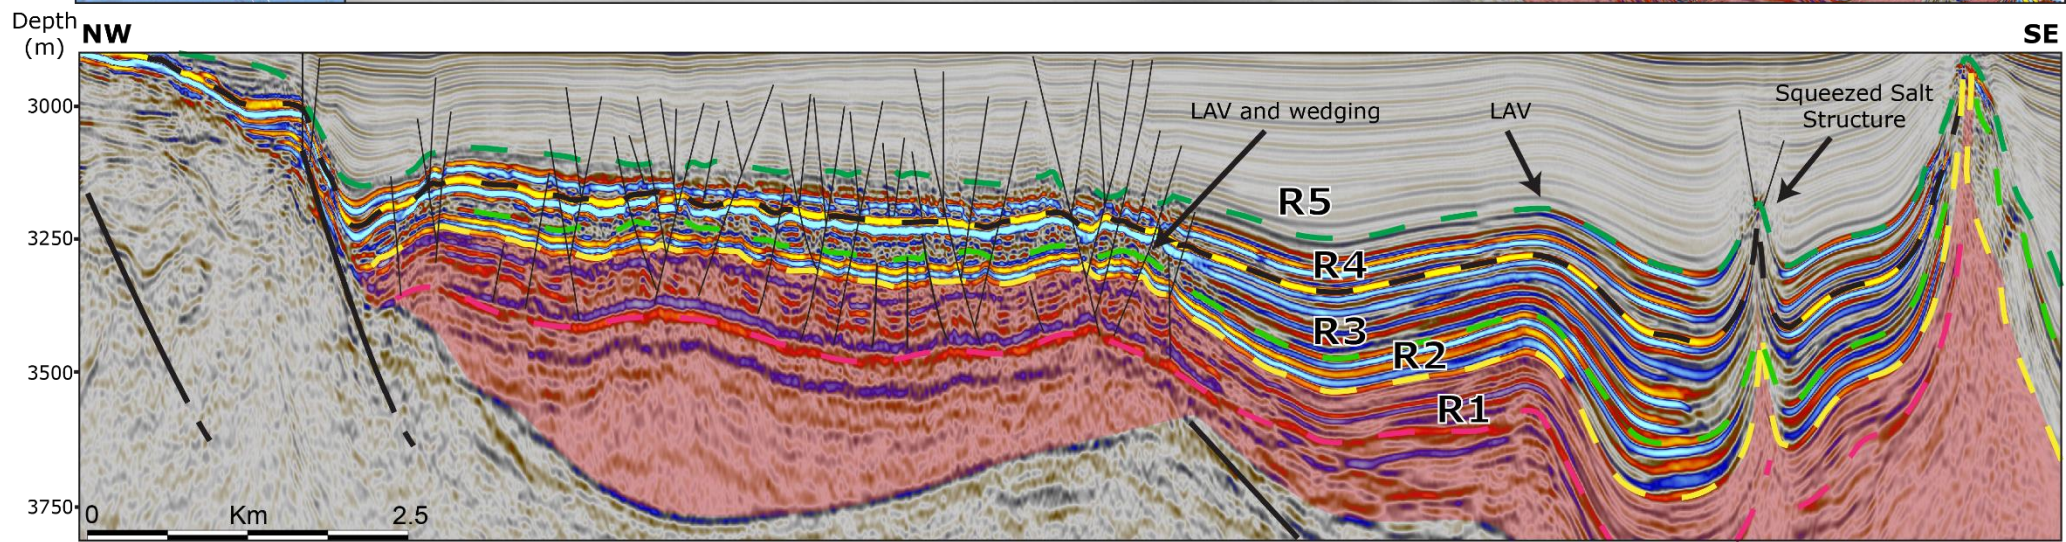

- Seismic horizons
- Mobile salt Unit
- Post-Salt Faults
- Pre-Salt Faults
- Interpreted Basement



*Figure 8 3D view of the SALTFLU seismic profiles along the Balearic margin of the Algerian basin, with a zoomed section along line SF06 showing the post-salt Messinian seismic facies. R1, R2, R3 and R4 represents the four seismic horizons observed regionally in the Algerian basin within the evaporites. Vertical exaggeration x5. Positioning map from Figure 1.*

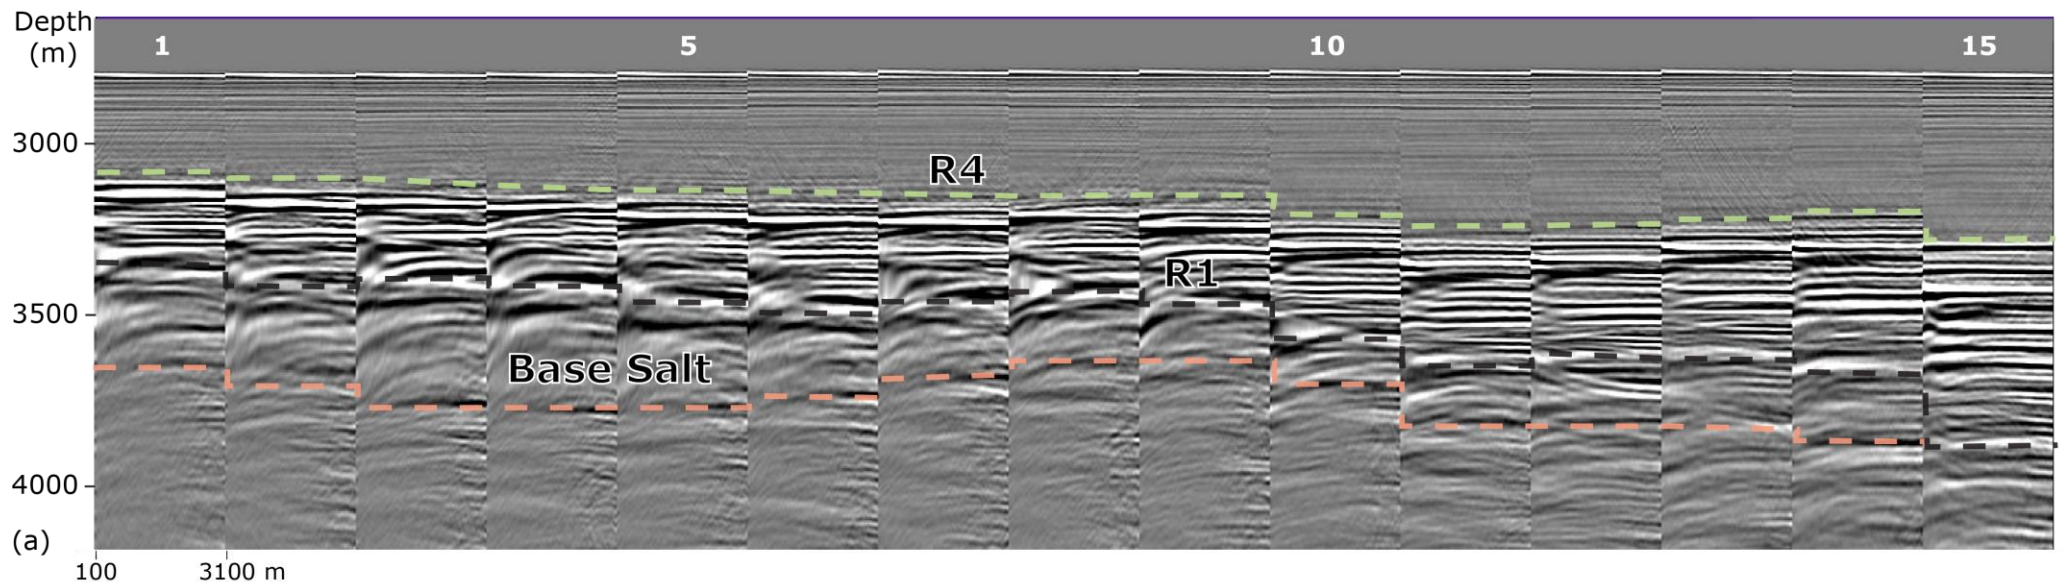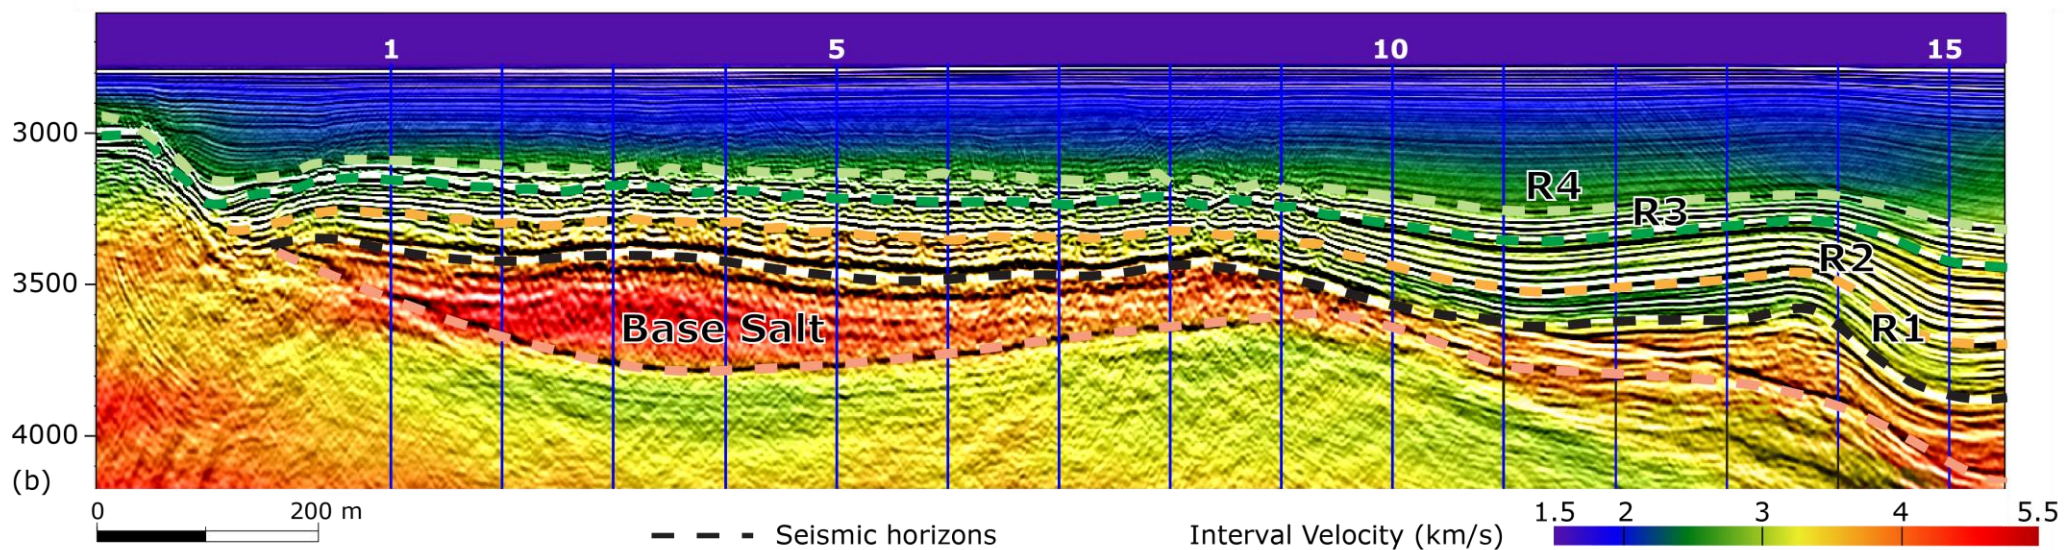

Figure 9 A section of line SF06 after pre-stack depth migration: (a) common reflection-point gathers with interval velocity overlay; (b) a single migrated offset plane (offset 1063 m) with interval velocity overlay (positions of gathers in (a) marked). The velocity of the upper evaporites increases downward from 2500 to 3500 m/s. The mobile salt unit was flooded with 4200 m/s. Two rounds of tomographic velocity updates were performed in the pre-salt sediments after salt velocity flooding.



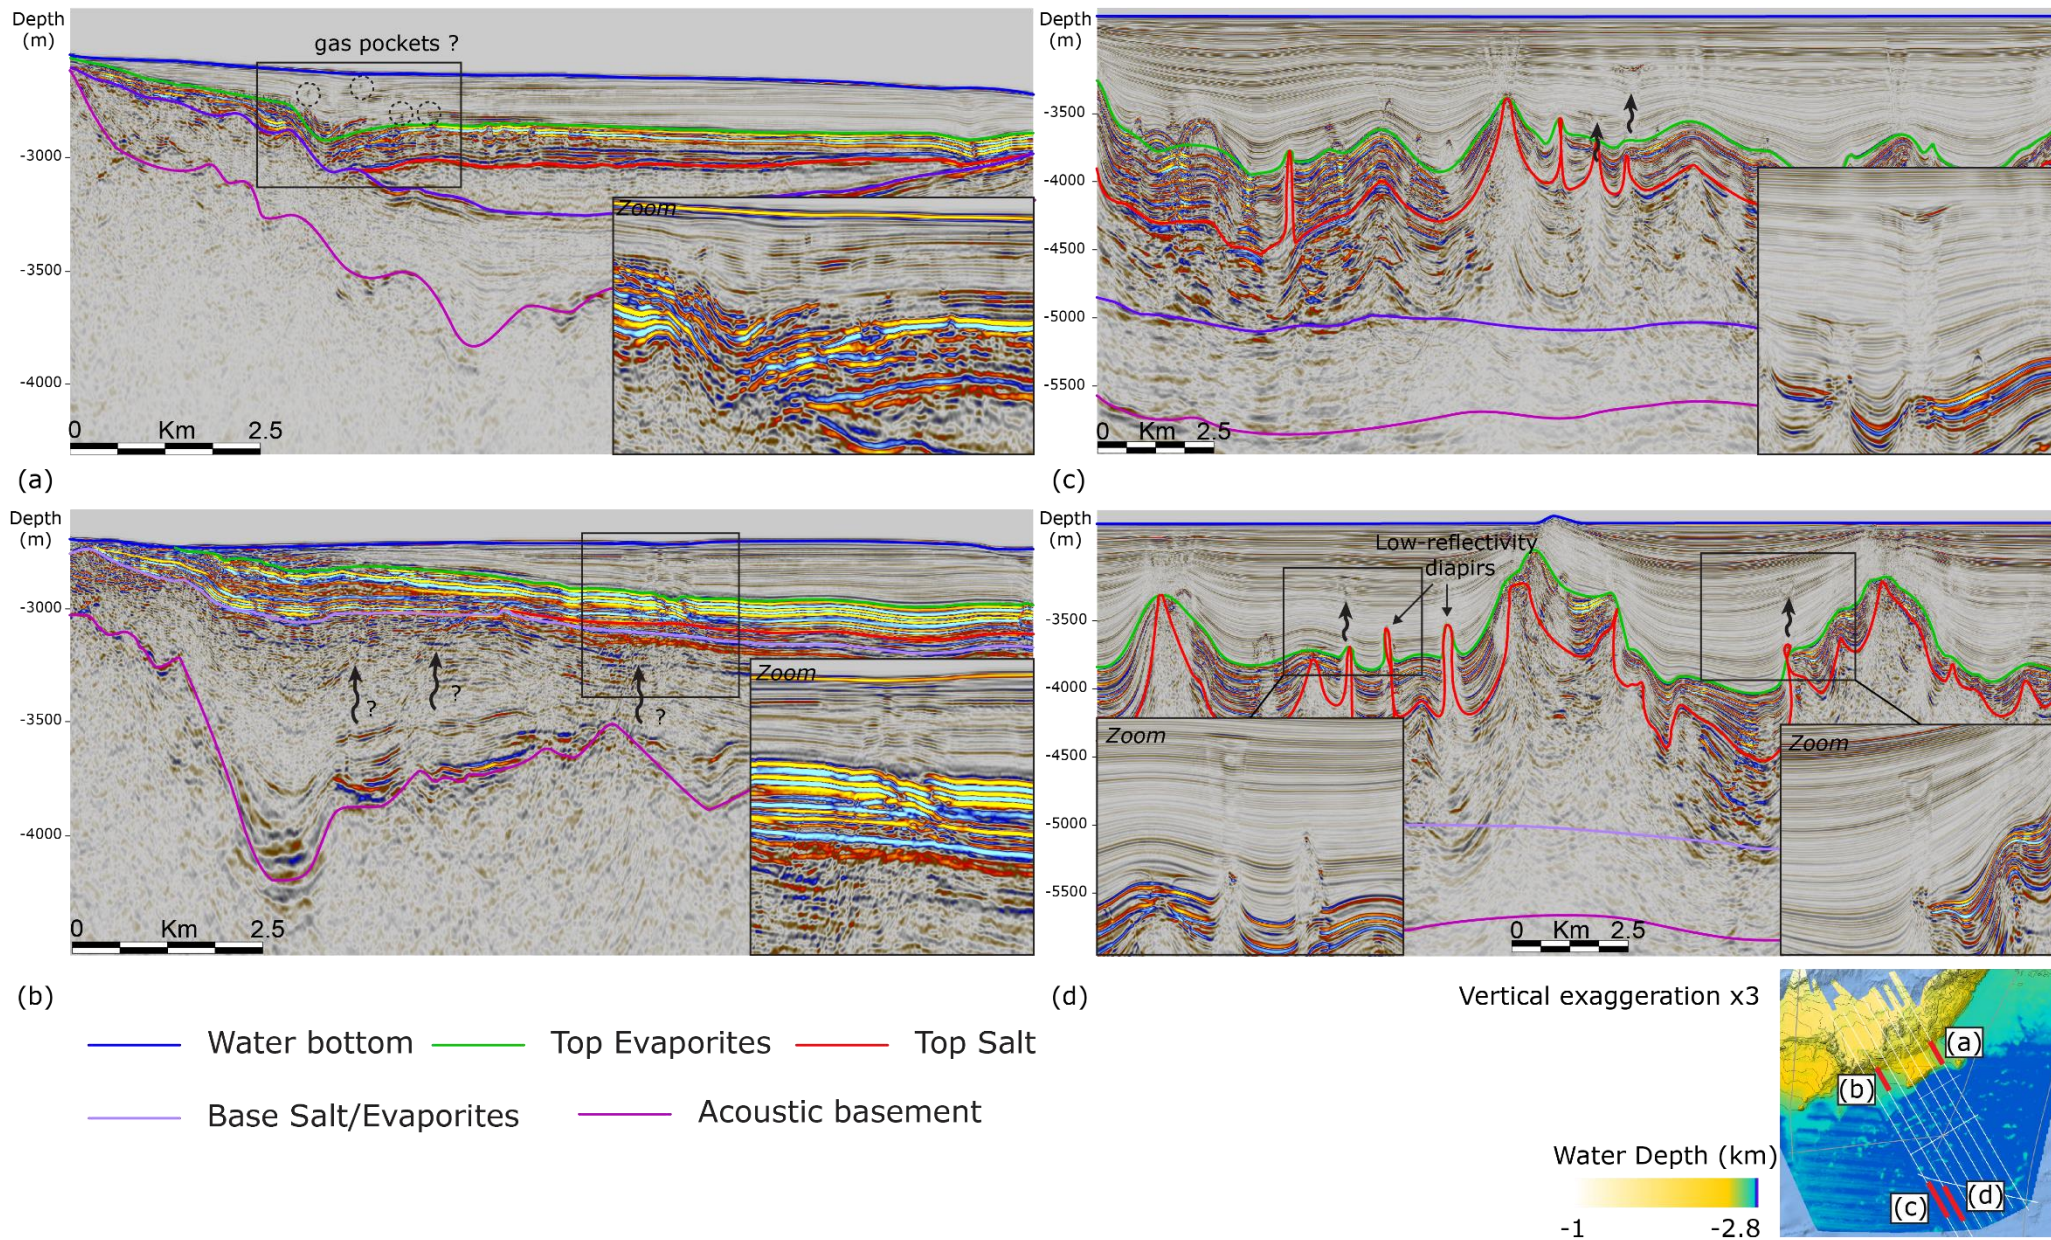

Figure 10 Sections in depth of lines SF03 (a), SF08 (b and d), and SF09 showing amplitude anomalies and disturbed bedding that may indicate the presence of fluid migration. Arrows indicate areas of blanking and/or disturbed bedding, representing possible fluid migration pathways. Vertical exaggeration x3. Positioning map from Figure 1.



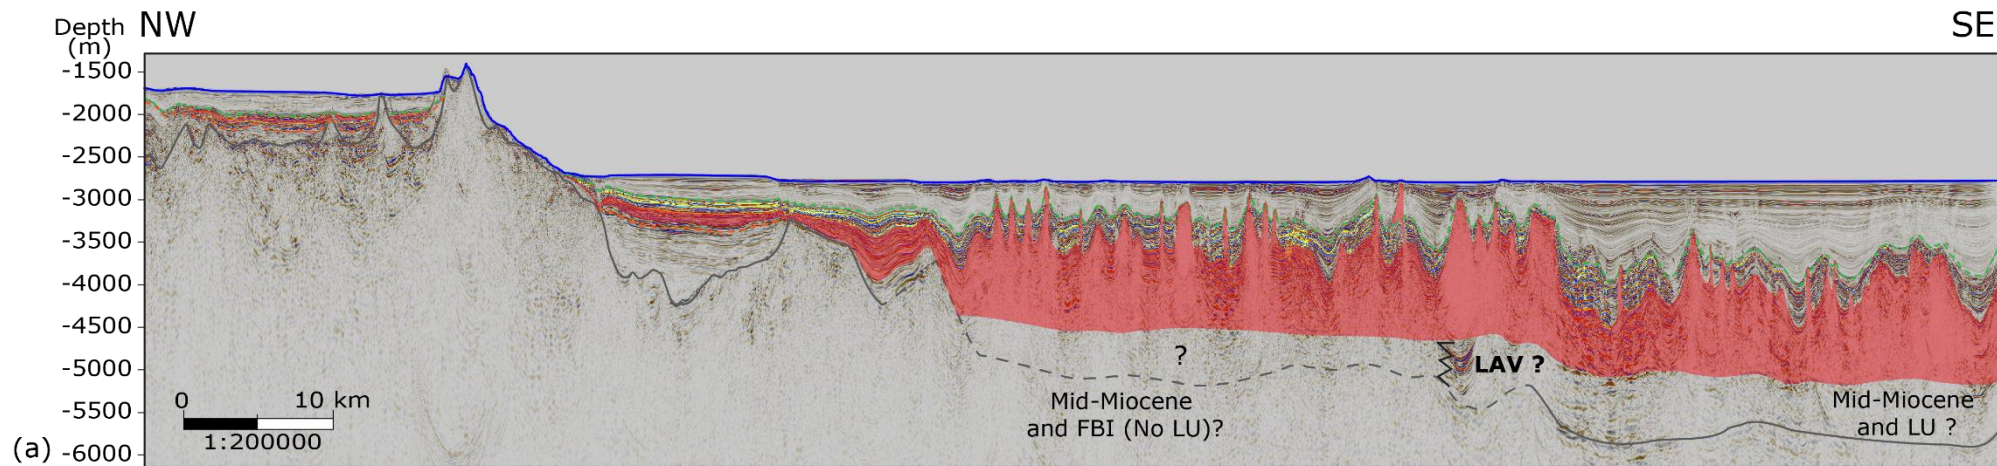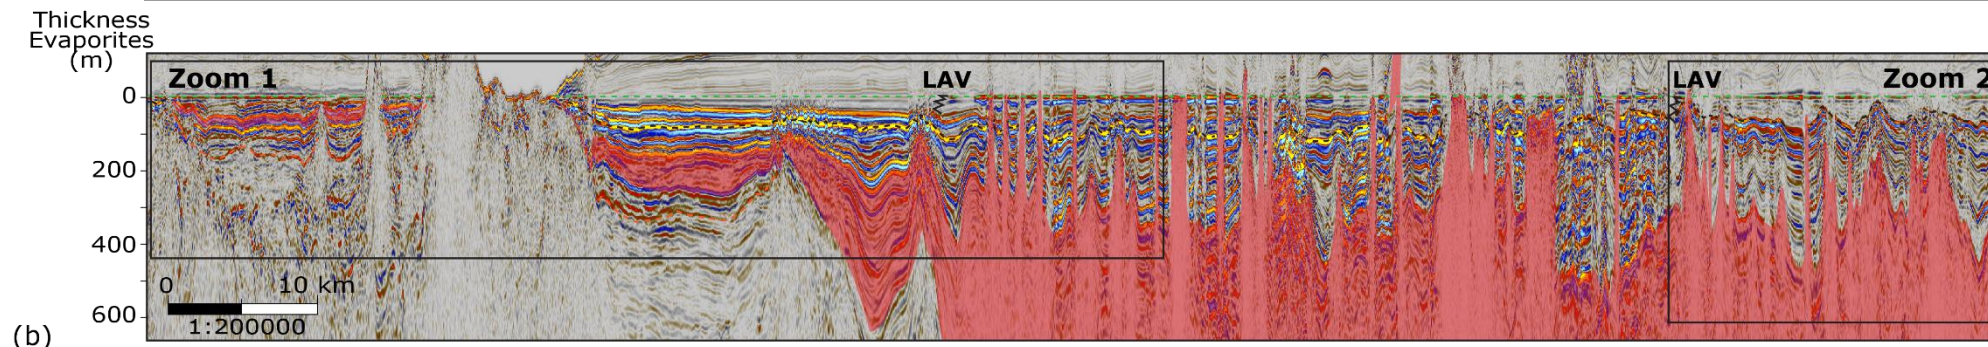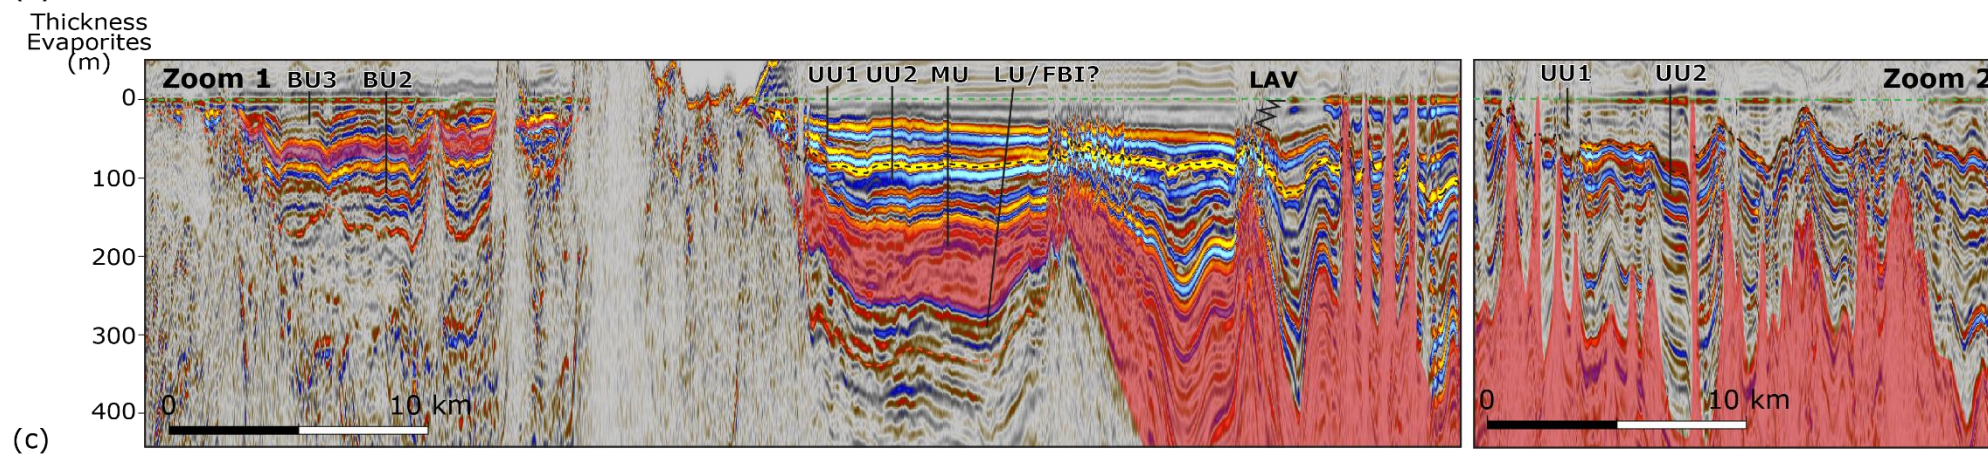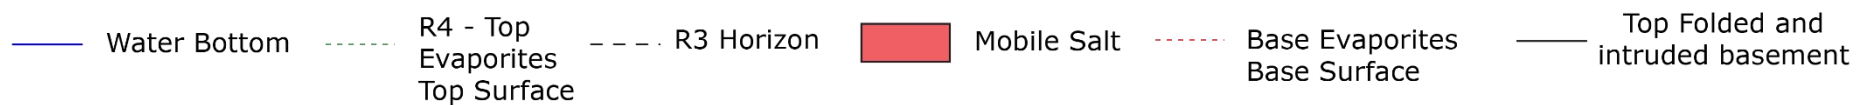



*Figure 11 Pre-stack depth migrated line SF09 before (a) and after flattening (b) along seismic horizon R5 (interpreted as the top of the Messinian evaporitic sequence). The two zoomed sections (c) along the flattened line illustrate the comparison between the Bedded Units of the Balearic promontory with the units of the Algerian basin, and the variation in seismic facies within the Messinian Upper Unit in the Algerian basin. Vertical exaggeration x8 for the original line, x20 for the flattened line.*



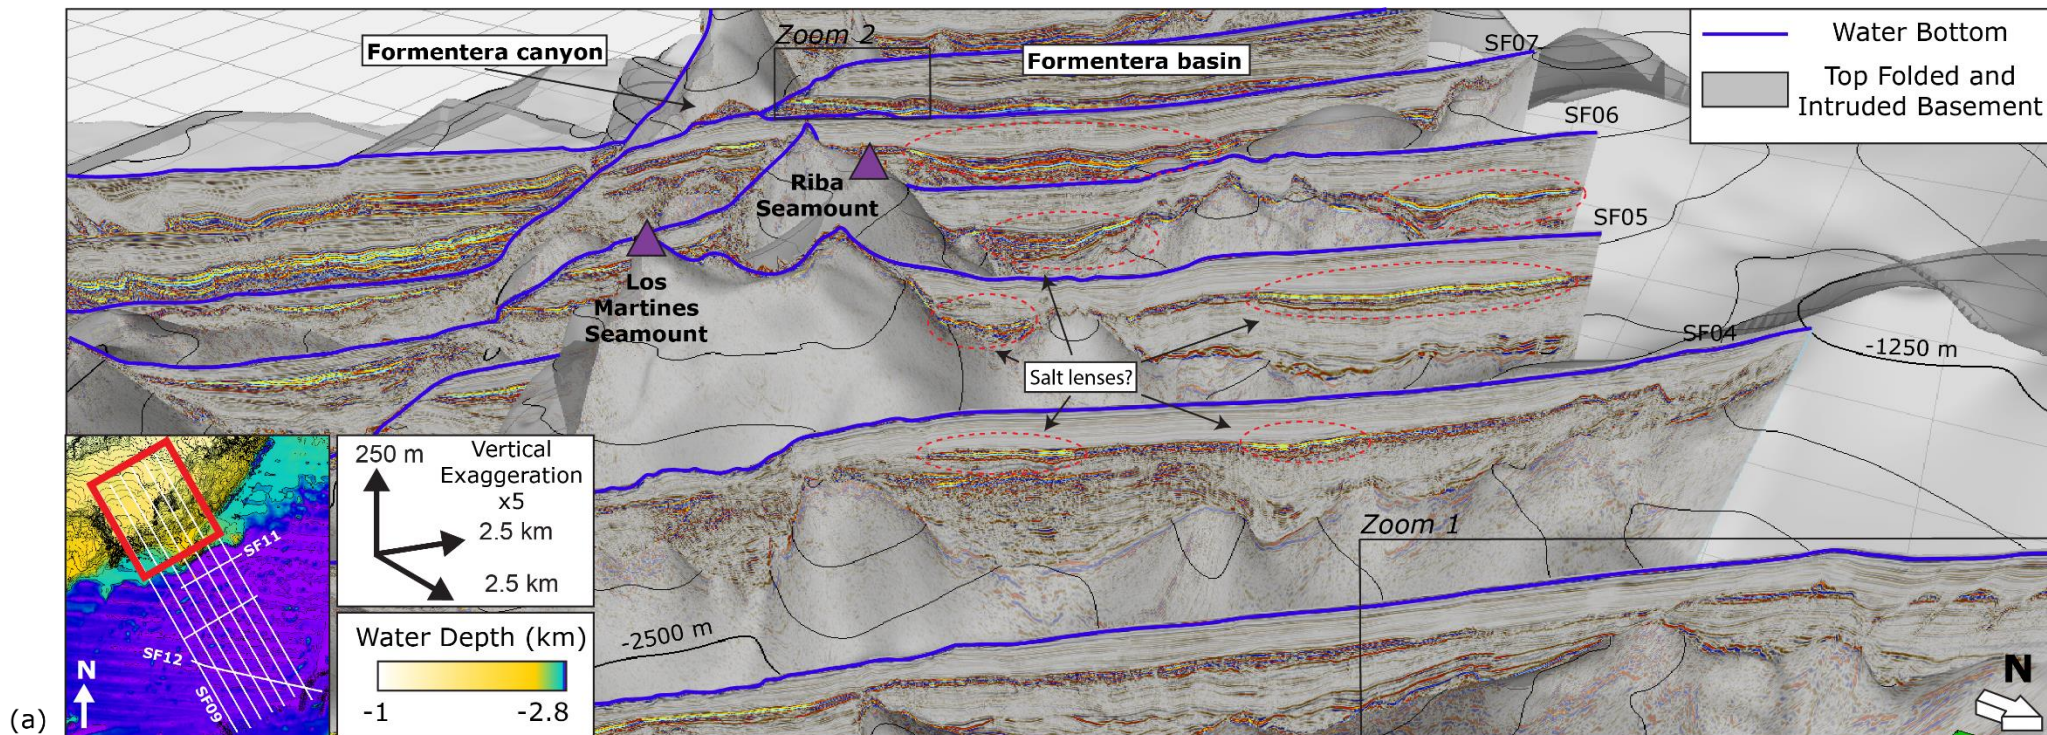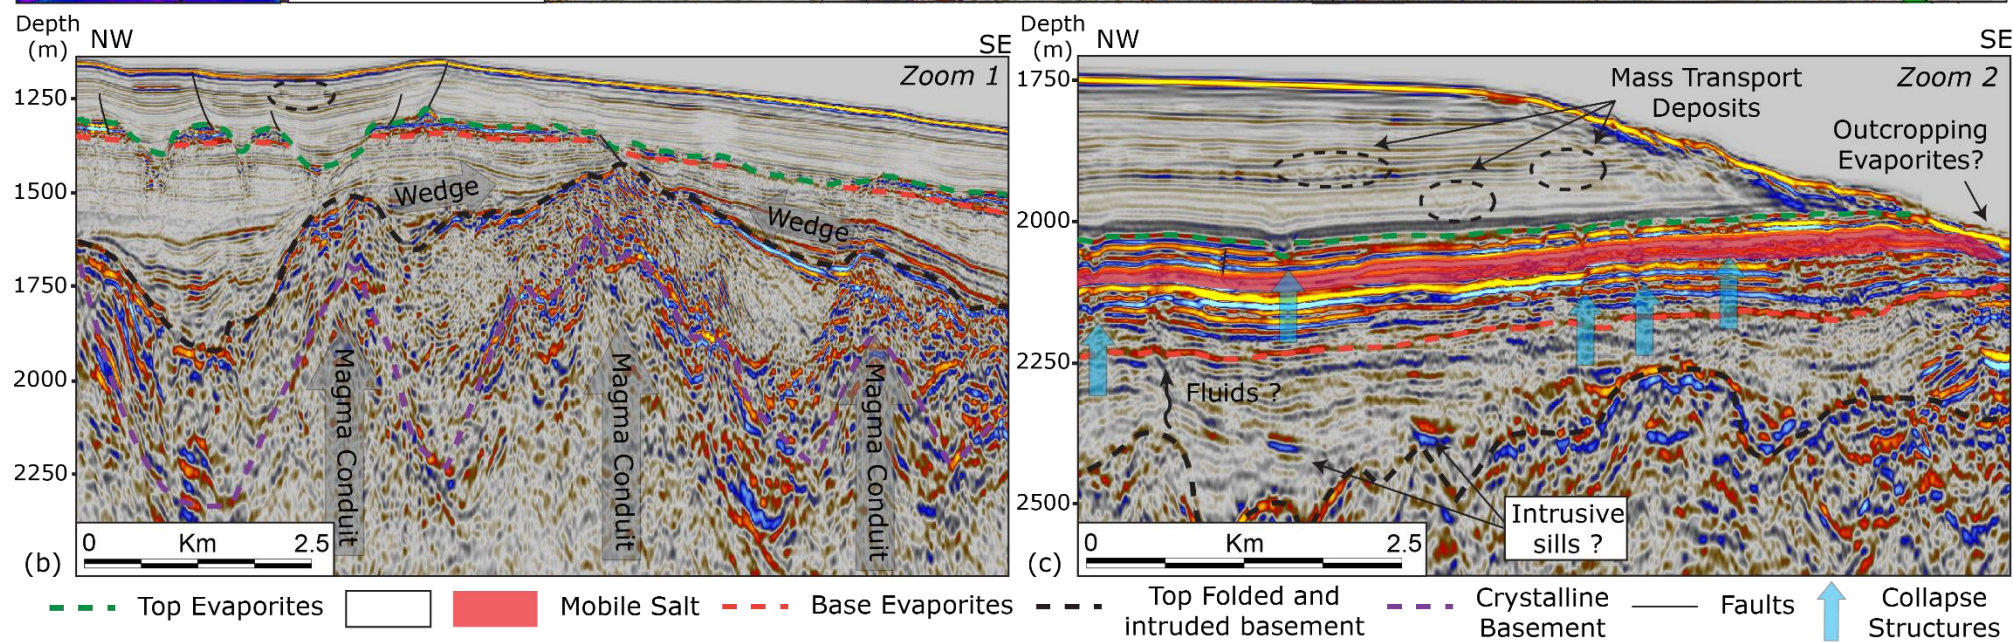



*Figure 12 3-D view of the SALTFLU seismic profiles along the Balearic promontory. Zoom 1 along line SF03 (zoom 1) shows the eroded and incised Messinian evaporites and the underlying volcanic basement, with onlapping wedges at both sides of the volcano. Zoom 2 along line SF08 shows the Messinian evaporites in the Formentera sub-basin, with several depressions at its top that suggest the presence of collapse structures, chaotic seismic facies in the Plio-Quaternary that suggests the presence of mass transport deposits, and disturbed signal below the Evaporites that could indicate fluid circulation. Vertical exaggeration x5*

Appendix 1 Impulse response of the Kirchhoff Pre-Stack time migration in the deep Algerian basin, without (a) and with an angle aperture (b)

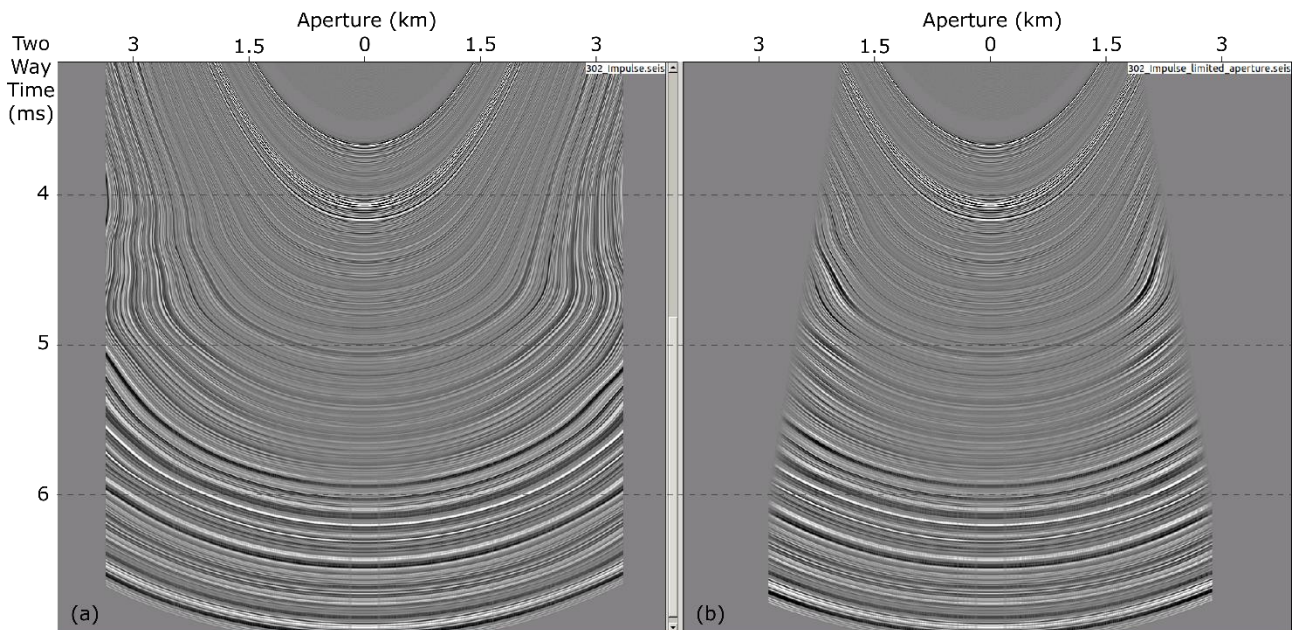

Appendix 2 List of the parameters used for the Kirchhoff pre-stack depth migration

| PSDM Parameters                    |                                            |
|------------------------------------|--------------------------------------------|
| Ray Tracing                        |                                            |
| Gridding                           | 2 CMP x 5meters                            |
| Number of ray takeoff angles       | 25                                         |
| Maximum takeoff angle              | 60°                                        |
| Stepper type                       | adaptive                                   |
| Error tolerance                    | 0.0004 m                                   |
| Minimum step                       | 4 ms                                       |
| Maximum step                       | 10 ms                                      |
| Wavefront step                     | 10 ms                                      |
| Coincident ray selection           | minimum travelttime                        |
| Maximum ray separation             | 100 m                                      |
| Maximum ray normal divergence      | 10°                                        |
| Interpolate rays using             | wavefront reconstruction                   |
| Maximum ray angle to vertical      | 90                                         |
| Maximum travel time                | 3500 ms                                    |
| Maximum ray generation             | 7                                          |
| Maximum shot time                  | 120 s                                      |
| Gaps filling                       | Fast sweeping method for eikonal equations |
| Kirchhoff prestack depth migration |                                            |
| Depth increment                    | 5 m                                        |
| Aperture (Depth/Radius)            | 1000-1500 /3250-3100/4500-4000             |
| Angle limit to aperture            | 70°                                        |
| Trace interpolation factor         | 8                                          |
| CMP bin patch size                 | 3                                          |
| Antialiasing filter increment      | 2.5 Hz                                     |
| Antialiasing filter roll-off       | 20 db/octave                               |
| Pad Fast Fourier Transform         | 500 samples                                |
| Amplitude scaling                  | 2D                                         |
| Derivative filter                  | 2D                                         |



Appendix 3 Depth imaging flow and list of the parameters used for the different tomographic inversion and velocity updates during the velocity model building

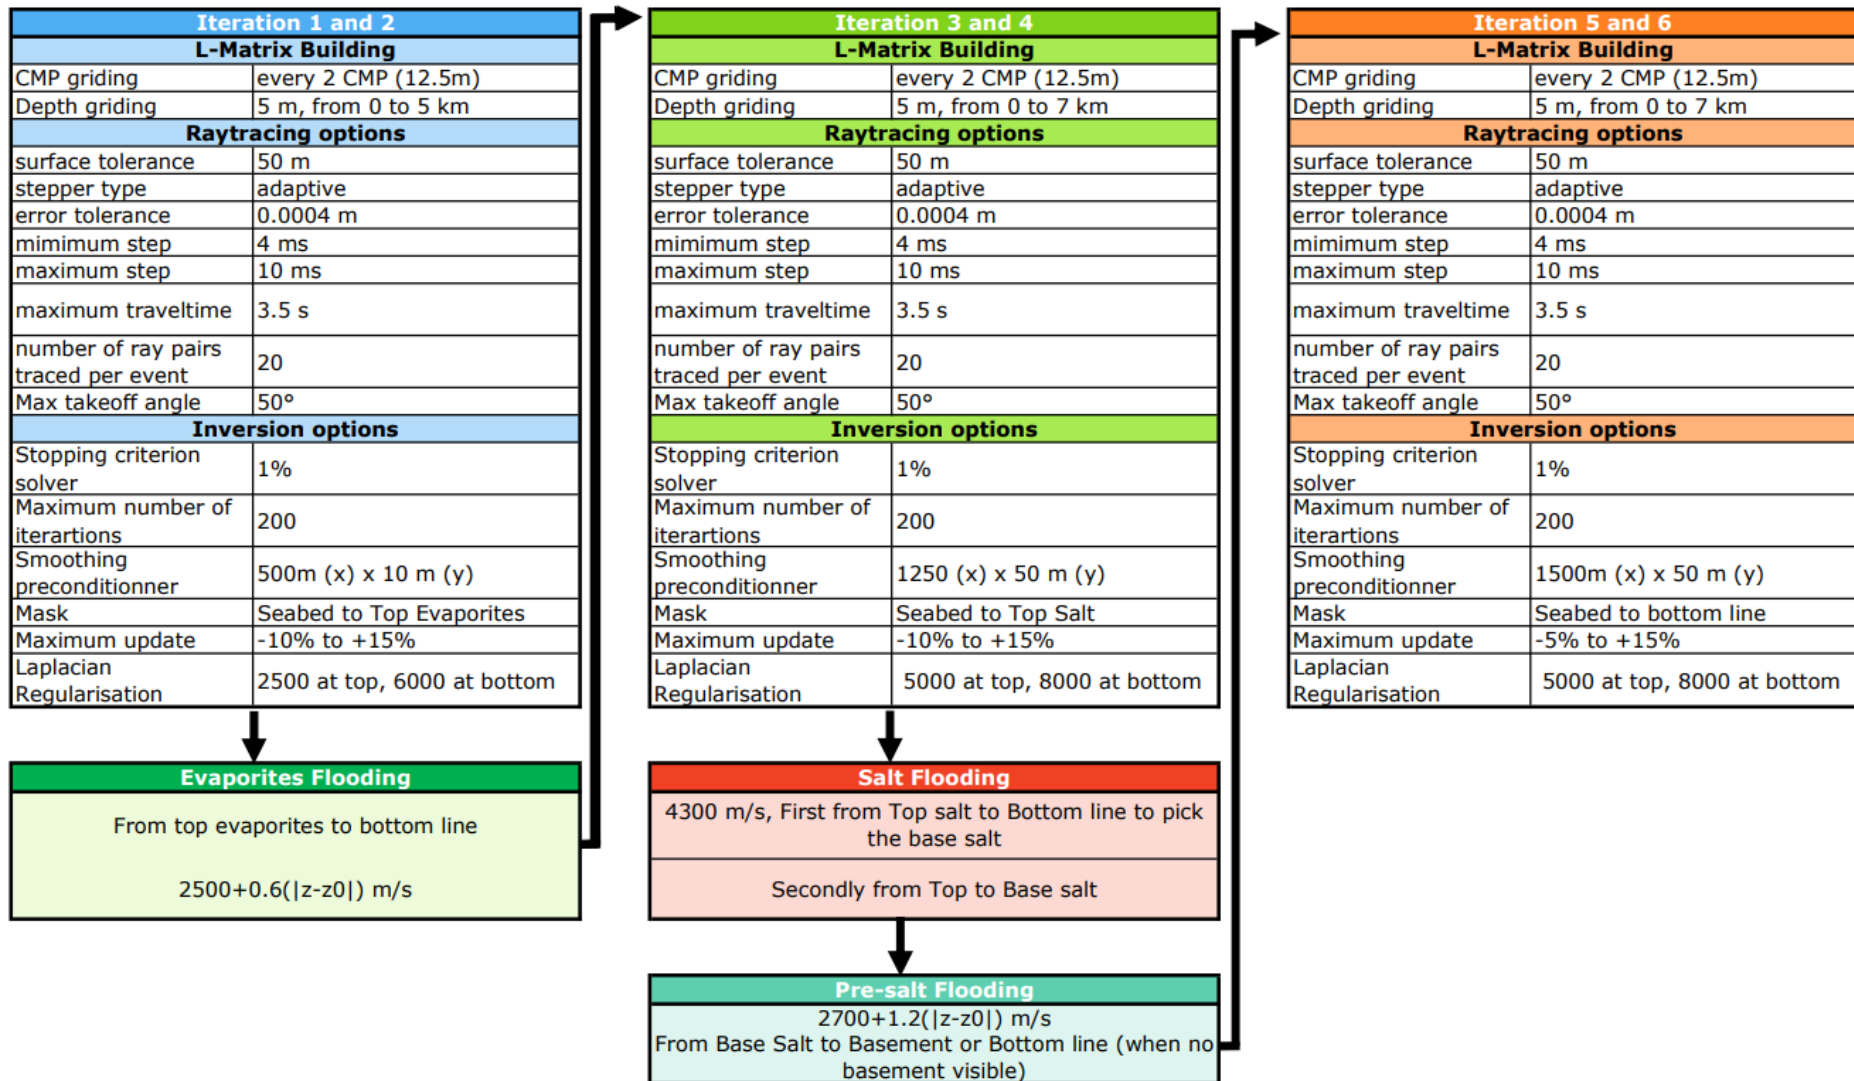

Supplement: Supplementary file 1 [file essd-2022-258-supplement.pdf]
